# Supplementary material
Source: publisher site journal article supplement (https://www.dovepress.com/article/258755)
Supplement: Supplementary file 1 [file get_supplementary_file.php]

**Supplementary Table 1.** 1- and 3-year Relative Survival estimates (%) by periods for DCR and DaRenCa (95% confidence interval in parenthesis).

| <b>1-year relative survival</b>        | <b>DCR</b> | <b>DaRenCaData</b> |
|----------------------------------------|------------|--------------------|
| Period 1 (August 2010 – July 2011)     | 78 (75-81) | 83 (80-86)         |
| Period 2 (August 2011 – July 2012)     | 77 (73-80) | 83 (79-86)         |
| Period 3 (August 2012 – July 2013)     | 81 (78-84) | 85 (82-88)         |
| Period 4 (August 2013 – July 2014)     | 81 (78-83) | 86 (84-89)         |
| Period 5 (August 2014 – July 2015)     | 84 (82-87) | 86 (84-89)         |
| Period 6 (August 2015 – December 2015) | 84 (80-88) | 87 (82-90)         |
|                                        |            |                    |
| <b>3-year relative survival</b>        | <b>DCR</b> | <b>DaRenCaData</b> |
| Period 1 (August 2010 – July 2011)     | 64 (61-68) | 72 (67-76)         |
| Period 2 (August 2011 – July 2012)     | 63 (59-67) | 71 (67-75)         |
| Period 3 (August 2012 – July 2013)     | 71 (67-74) | 76 (72-80)         |
| Period 4 (August 2013 – July 2014)     | 69 (65-72) | 76 (72-79)         |
| Period 5 (August 2014 – July 2015)     | 74 (70-77) | 76 (72-79)         |
| Period 6 (August 2015 – December 2015) | NA         | NA                 |

**Supplementary Table 2.** 3-year mortality rate ratios with time variations for patients in DCR and DaRenCaData (Model 2)

|                                                                                               | <b>Number of deaths</b> | <b>3-year Mortality Rate Ratio (95% CI)</b> |
|-----------------------------------------------------------------------------------------------|-------------------------|---------------------------------------------|
| <b>Time measured as a categorical variables</b>                                               |                         |                                             |
| Period 1 (August 2010 – July 2011)                                                            | 215                     | <i>[Reference category]</i>                 |
| Period 2 (August 2011 – July 2012)                                                            | 214                     | 1.00 (0.89-1.13)                            |
| Period 3 (August 2012 – July 2013)                                                            | 216                     | 0.85 (0.75-0.96)                            |
| Period 4 (August 2013 – July 2014)                                                            | 235                     | 0.84 (0.74-0.94)                            |
| Period 5 (August 2014 – July 2015)                                                            | 236                     | 0.77 (0.68-0.87)                            |
| Period 6 (August 2015 – December 2015)                                                        | 90                      | 0.78 (0.66-0.92)                            |
| <b>Time measured as a continuous variable</b>                                                 |                         |                                             |
| Years between date of diagnosis and start of observation period (August 1 <sup>st</sup> 2010) | -                       | 0.94 (0.92-0.96)                            |
